# Supplementary material for: PMEPA1 Is a Prognostic Biomarker That Correlates With Cell Malignancy and the Tumor Microenvironment in Bladder Cancer
Source: PubMed Central journal article supplement (PMC8582246; doi:10.3389/fimmu.2021.705086), 2021-10-28

Partial\_Cor

⊗  $p > 0.05$

■  $p \dots 0.05$

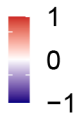

- Macrophages
- Cancer associated fibroblasts
- MDSCs
- Monocyte
- Neutrophils
- Tregs
- Myeloid dendritic cells
- NK cells
- B cells
- T cells CD4+
- T cells CD8+

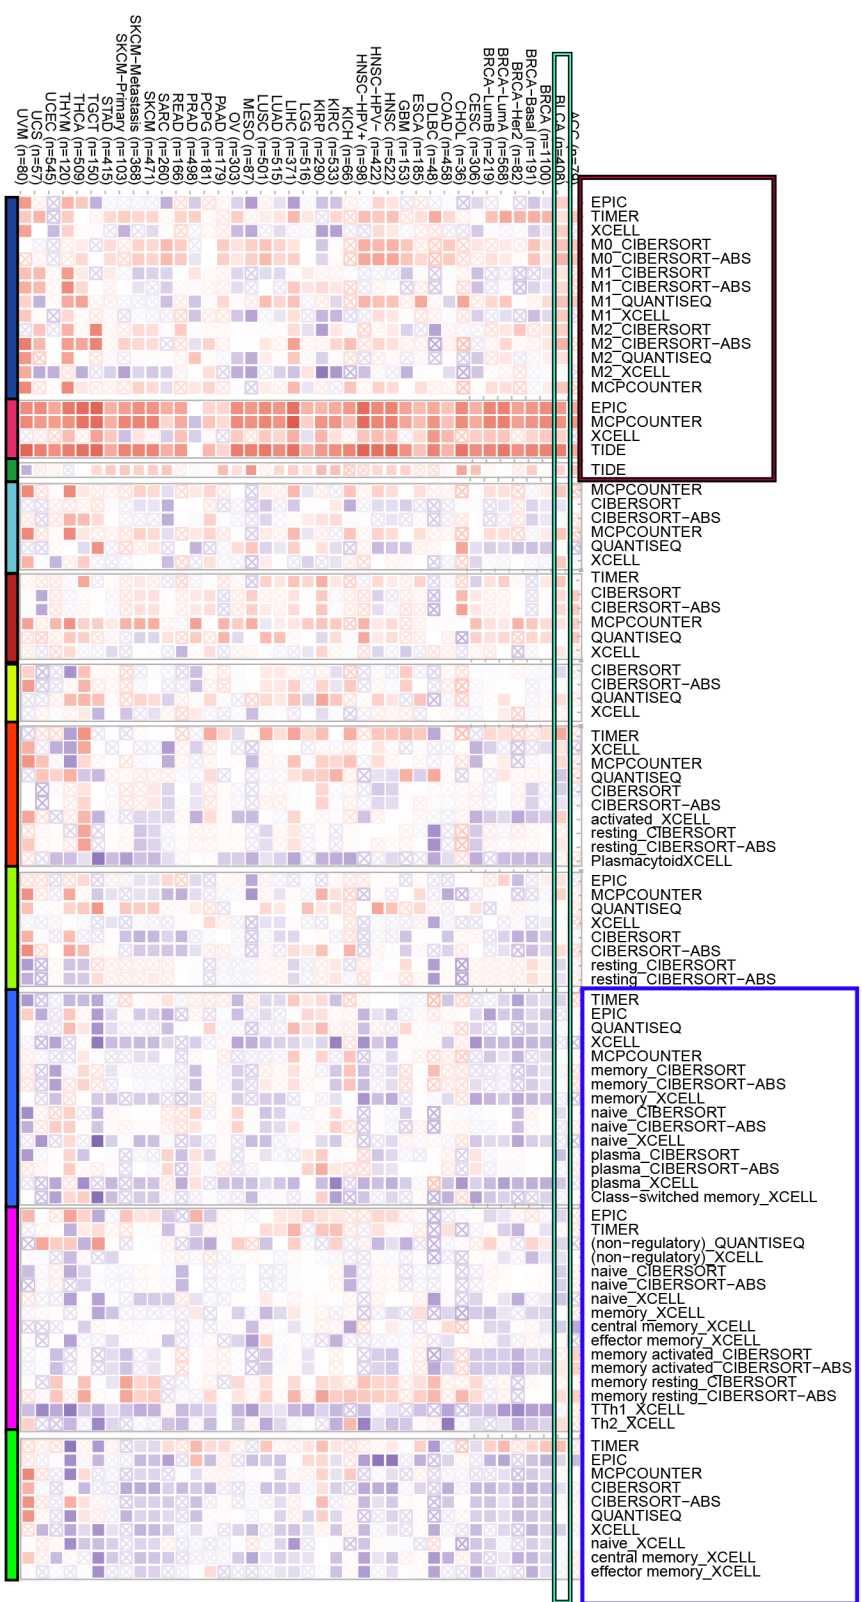

Supplement: Image_4.pdf [file Image_4.pdf]
