# Supplementary material for: PMEPA1 Is a Prognostic Biomarker That Correlates With Cell Malignancy and the Tumor Microenvironment in Bladder Cancer
Source: PubMed Central journal article supplement (PMC8582246; doi:10.3389/fimmu.2021.705086), 2021-10-28

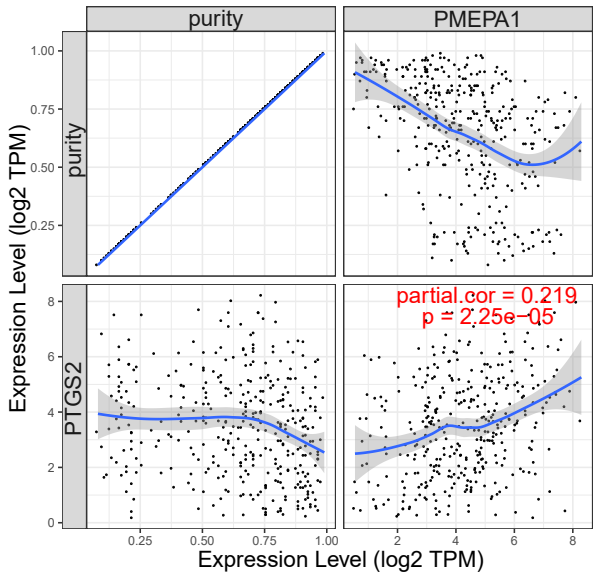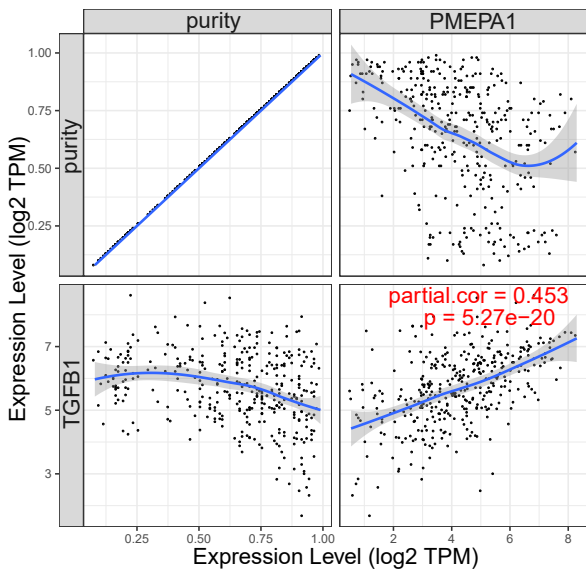

Supplement: Image_6.pdf [file Image_6.pdf]
